# Supplementary material for: A class-mismatched TCR bypasses MHC restriction via an unorthodox but fully functional binding geometry
Source: PubMed Central journal article supplement (PMC9691722; doi:10.1038/s41467-022-34896-0), 2022-11-23
Supplement: 41467_2022_34896_MOESM1_ESM.pdf [file 41467_2022_34896_MOESM1_ESM.pdf]

## Supplementary Information

### **A class-mismatched TCR bypasses MHC restriction via an unorthodox but fully functional binding geometry**

Nishant K. Singh, Jesus A. Alonso, Jason R. Devlin, Grant L. J. Keller, George I. Gray, Adarsh K. Chiranjivi, Sara G. Foote, Lauren M. Landau, Alyssa G. Arbuiso, Laura I. Weiss, Aaron M. Rosenberg, Lance M. Hellman, Michael I. Nishimura, and Brian M. Baker

**Supplementary Figure 1:** Interatomic TCR-peptide/MHC contacts.

**Supplementary Figure 2:** Effects of mutations in the TIL1383I CDR3 $\beta$  and CDR3 $\alpha$  loops.

**Supplementary Figure 3:** Effects of mutation of Arg65 of HLA-A2 to alanine.

**Supplementary Figure 4:** Structural alignment of class II MHC onto class I and comparison of key residues.

**Supplementary Figure 5:** Overview of the rapid process for  $K_D$  determination using the UV-exchanged peptide/HLA-A2 library.

**Supplementary Figure 6:** Differential scanning fluorimetry analysis of the UV-exchanged peptide/HLA-A2 library.

**Supplementary Figure 7:** Flow cytometry gating.

**Supplementary Table 1:** X-ray data and refinement statistics.

**Supplementary Table 2:** Oligonucleotides used for site directed mutagenesis.

**a**

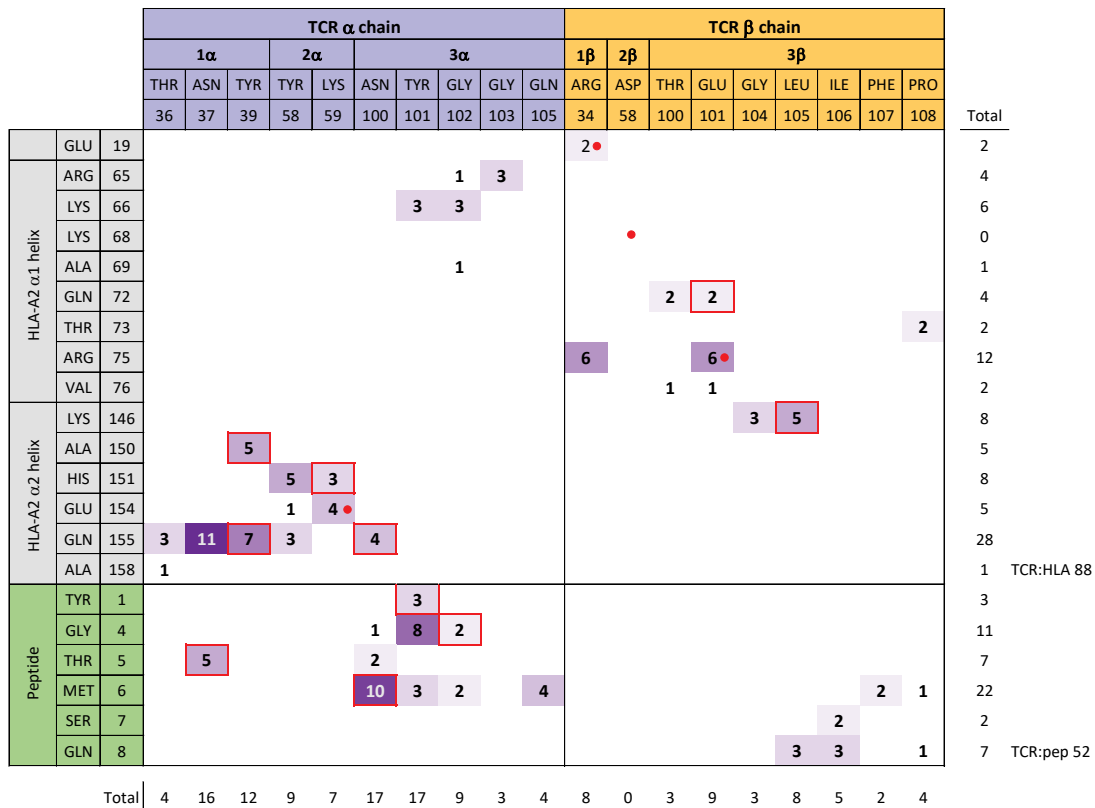

**b**

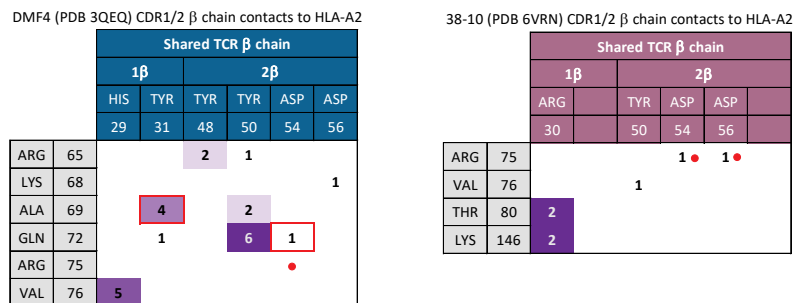

**c**

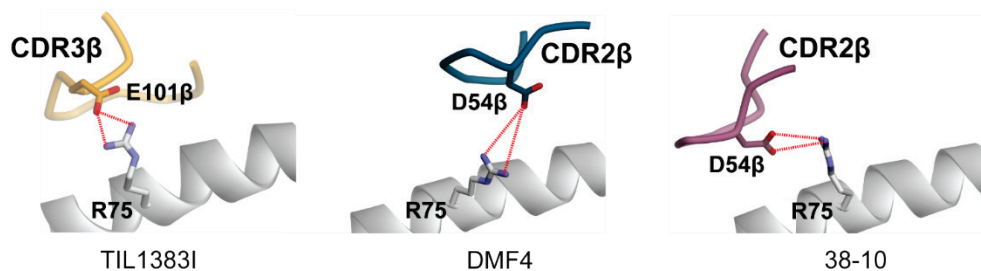

**Supplementary Figure 1.** Interatomic TCR-peptide/MHC contacts.

**a)** Contacts between amino acids in the interface between TIL1383I and Tyr<sub>370D</sub>/HLA-A2. Contacts are tabulated as interatomic distances  $\leq 4$  Å. The total number of contacts is colored from white (minimum) to purple (maximum). The presence of one or more hydrogen bonds is indicated by a red square; the presence of one or more salt bridges is indicated by a red dot (salt bridge distances can be  $> 4$  Å).

**b)** Contacts between the CDR1 $\beta$  and CDR2 $\beta$  loops and HLA-A2 in the DMF4 (left) and 38-10 (right) TCRs, which share *TRBV10-3* with TIL1383I, tabulated and colored as in panel **a**.

**c)** In the CDR2 $\beta$  loops of the *TRBV10-3* TCRs DMF4 and 38-10, Asp54 forms salt bridges with Arg75 on the HLA-A2  $\alpha$ 1 helix. In the TIL1383I structure, however, this salt-bridge is formed by Glu101 in CDR3 $\beta$ .

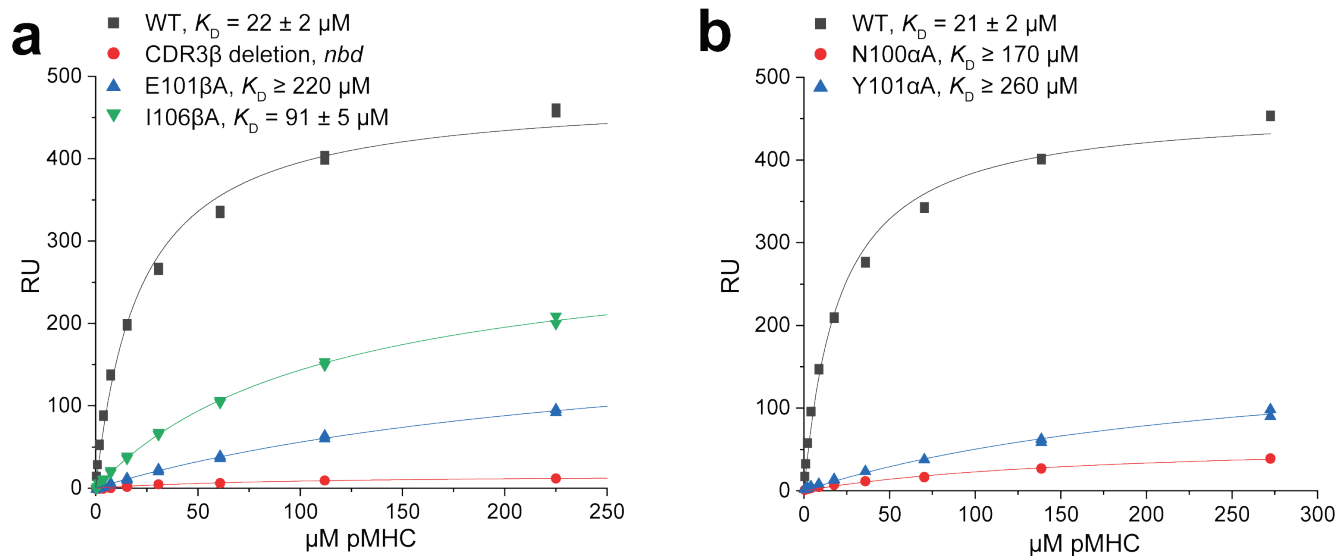

**Supplementary Figure 2.** Mutations in the TIL1383I CDR3 $\beta$  and CDR3 $\alpha$  loops confirm important interactions with Tyr<sub>370D</sub>/HLA-A2 seen in the TCR-pMHC crystal structure as measured by surface plasmon resonance (SPR).

**a)** Mutations in CDR3 $\beta$  and their effects on TCR binding. CDR3 $\beta$  deletion (red) refers to a mutant in which Glu102, Gly103, and Gly104 of the CDR3 $\beta$  are deleted, shortening the loop by three amino acids. No binding was detected (*nbd*) for this experiment. Mutation of Glu101 $\beta$  (blue) and Ile106 $\beta$  (green) in the CDR3 $\beta$  loop to alanine substantially weakened binding.

**b)** Mutation of Asn100 $\alpha$  (red) and Tyr101 $\alpha$  (blue) in the CDR3 $\alpha$  loop also substantially weakened binding. Errors in both panels are standard fitting errors from simultaneous analysis of two datasets. Source data are provided in the Source Data file.

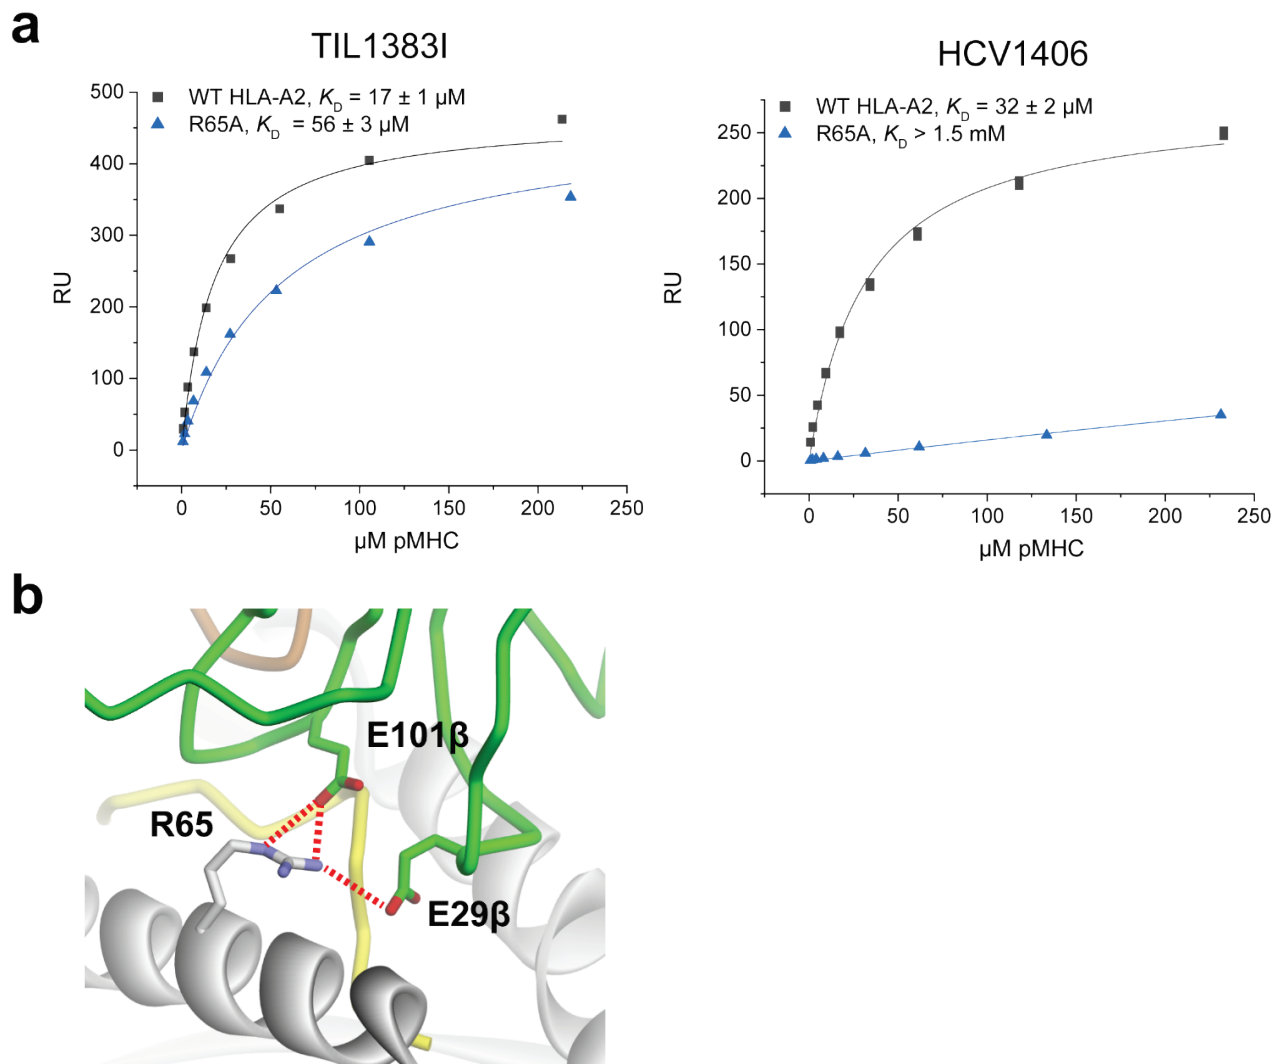

**Supplementary Figure 3.** Mutation of Arg65 of HLA-A2 to alanine has a large effect on the binding of the canonically binding TCR HCV1406, but a much smaller effect with TIL1383I.

**a)** SPR titrations with fits to the data and fitted  $K_D$  values for TIL1383I binding Tyr<sub>370D</sub>/HLA-A2 (left) and HCV1406 binding NS3/HLA-A2 (right). The  $\Delta\Delta G^\circ$  for TIL1383I is 0.7 kcal/mol, whereas for HCV1406 it is > 2.3 kcal/mol. Errors are standard fitting errors from simultaneous analysis of two datasets. Source data are provided in the Source Data file.

**b)** Electrostatic interactions involving Arg65 in the HCV1406-NS3/HLA-A2 interface. Compare with Fig. 4a, which shows Arg65 in the TIL1383I interface.

**a**

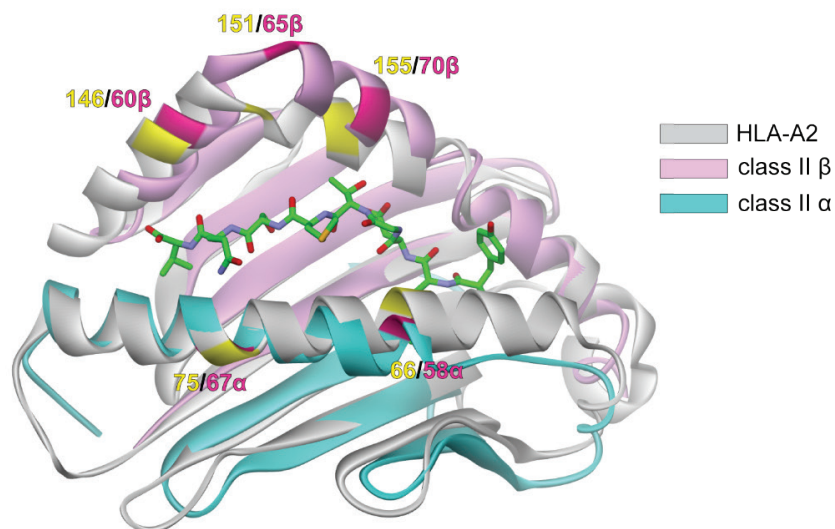

**b**

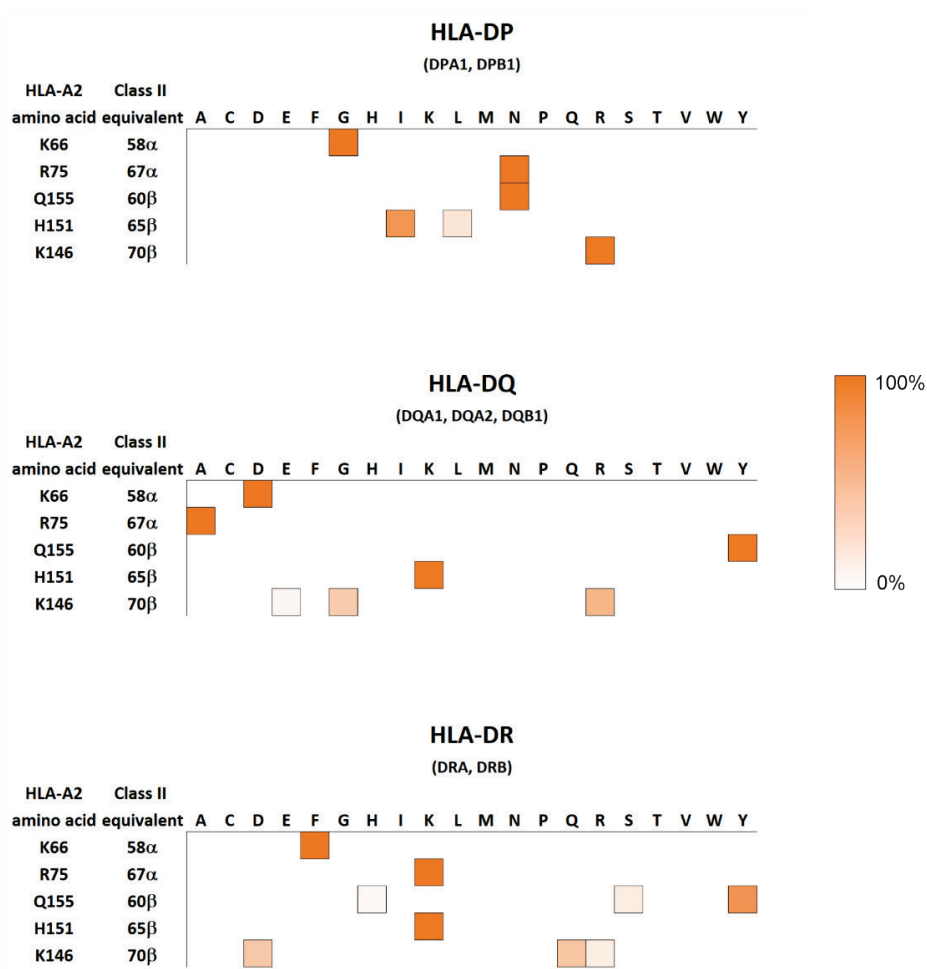

**Supplementary Figure 4.** Structural alignment of class II MHC onto class I and comparison of key residues.

**a)** Structural alignment with key positions in HLA-A2 and their equivalents in the class II  $\alpha$ 1 and  $\beta$ 1 helices highlighted.

**b)** Amino acids found at the positions highlighted in panel **a** in HLA-DP (top), DQ (middle), and DR genes. Percentage of each amino acid at each position are indicated via the white-orange scale at the right.

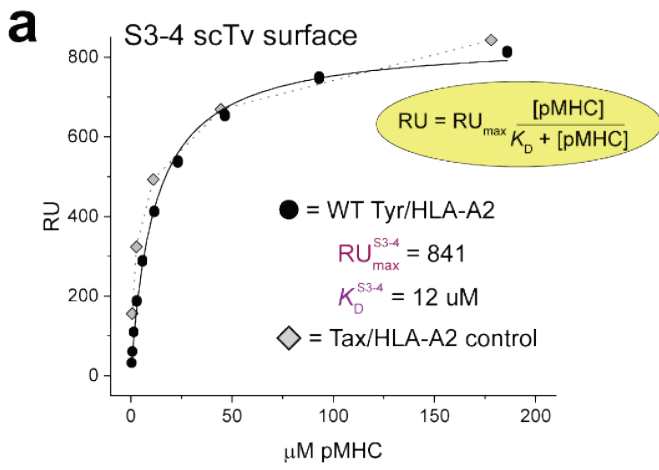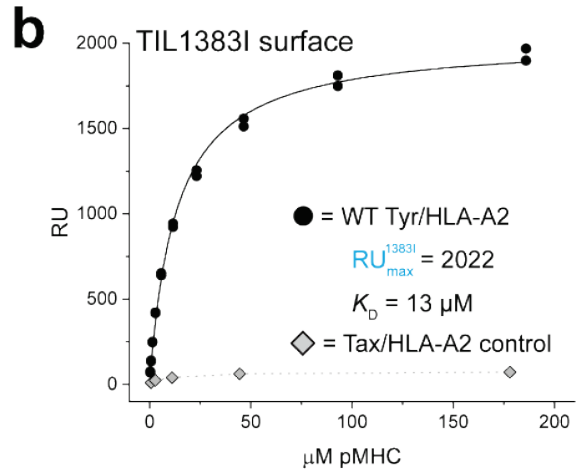

**c** UV exchanged pMHC samples

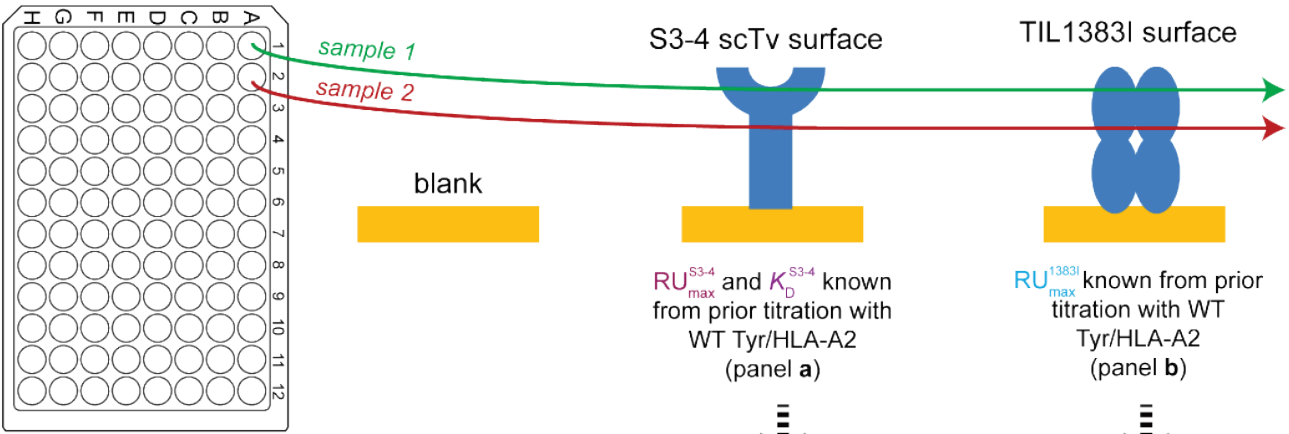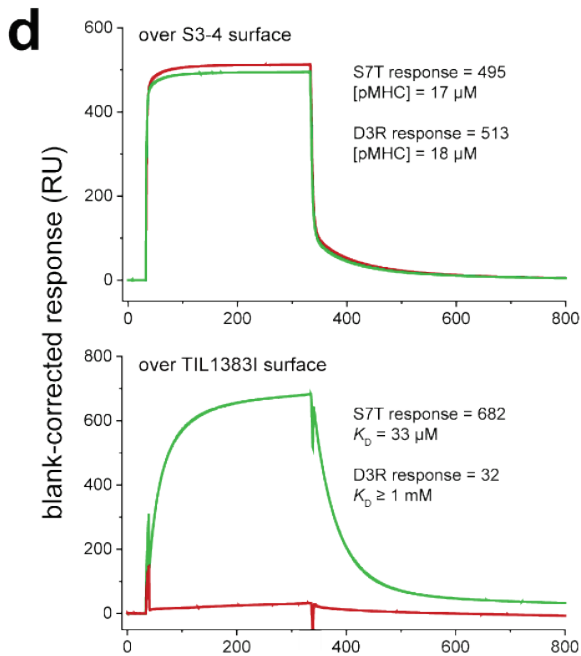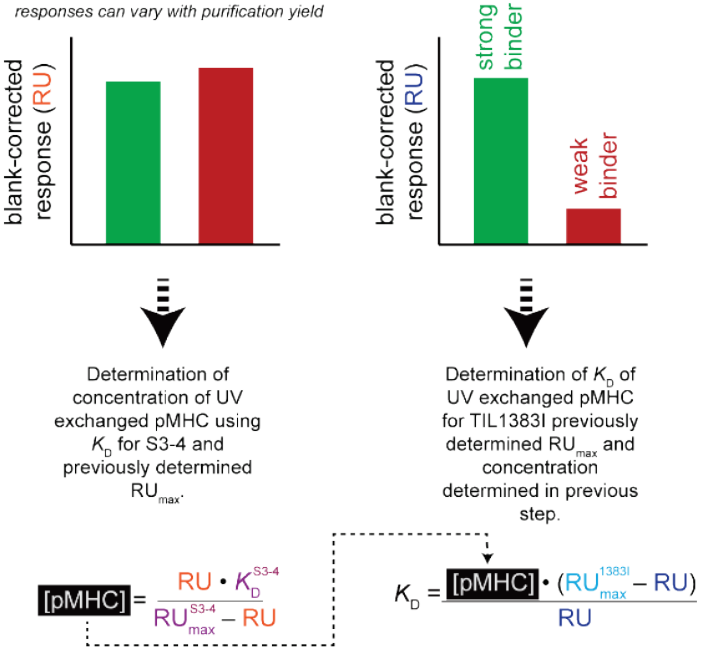

**Supplementary Figure 5 (previous page).** Overview of the process for  $K_D$  determination using the UV-exchanged peptide/HLA-A2 library.

**a, b)** After coupling to adjacent SPR sensor surfaces, the affinity ( $K_D$ ) and active surface densities ( $RU_{max}$ ) of the S3-4 scTv (panel **a**) and TIL1383I TCR (panel **b**) were determined through traditional SPR steady state titrations, shown here for representative titrations. Tax/HLA-A2 is an irrelevant peptide/HLA-A2 complex (peptide sequence LLFGYPVYV) that is recognized by S3-4 but not TIL1383I. The equation circled in yellow describes simple 1:1 binding; this equation is manipulated for relevant variables as shown at the bottom of panel **c**. Parameters from the fitted curves are colored to highlight mathematical manipulations. Source data are provided in the Source Data file.

**c)** Following determination of the  $K_D$  and  $RU_{max}$  for the S3-4 and TIL1383I surface, samples from the UV-exchanged peptide/HLA-A2 library were injected sequentially over the S3-4 and TIL1383I surface (along with a blank surface for bulk response correction). The blank-corrected response (RU) from the scTv surface, together with the previously determined  $K_D$  and  $RU_{max}$  for the S3-4 surface, allows calculation of the active concentration of peptide/HLA-A2. The blank-corrected response from the TIL1383I surface, together with the active concentration of peptide/HLA-A2 and previously determined  $RU_{max}$  for the TIL1383I surface, allows determination of the  $K_D$ . Red and green bars illustrate responses for peptide/HLA-A2 samples that are recognized similarly by S3-4 as expected (but with SPR responses that vary with exchange/purification yield), but are recognized either strongly or weakly by TIL1383I.

**d)** Representative data for strong and weak TIL1383I binders as diagrammed in panel **c** (Tyr<sub>370D</sub> pS7→T and pD3→R). Both samples gave good responses over the S3-4 surface as expected, yielding concentrations of 17-18  $\mu$ M. The strong binder gives a good response over the TIL1383I surface, indicating an affinity of 33  $\mu$ M for pS7→T, whereas the affinity of the weak binder pD3→R is estimated to be  $\geq 1$  mM. Source data are provided in the Source Data file.

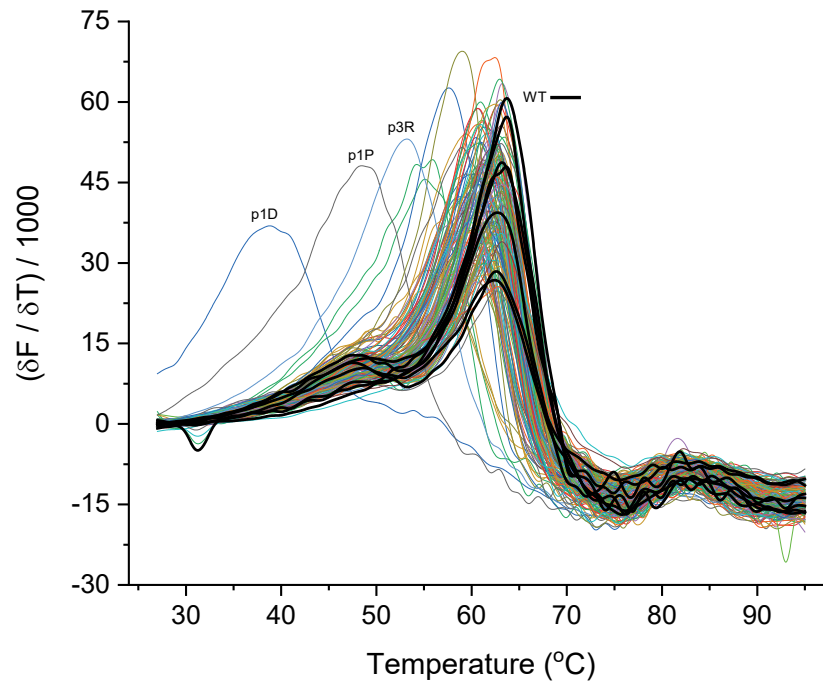

**Supplementary Figure 6.** Differential scanning fluorimetry analysis of the UV-exchanged peptide/HLA-A2 library, plotted as the first derivative of the fluorescence response with respect to temperature. Solid black lines are the seven UV-exchanged WT Tyr<sub>370D</sub>/HLA-A2 complexes, all showing  $T_m$  values of 62-63 °C. Melting curves for complexes with substantially weaker  $T_m$  values are highlighted (p1D, p1P, p3R). Source data are provided in the Source Data file.



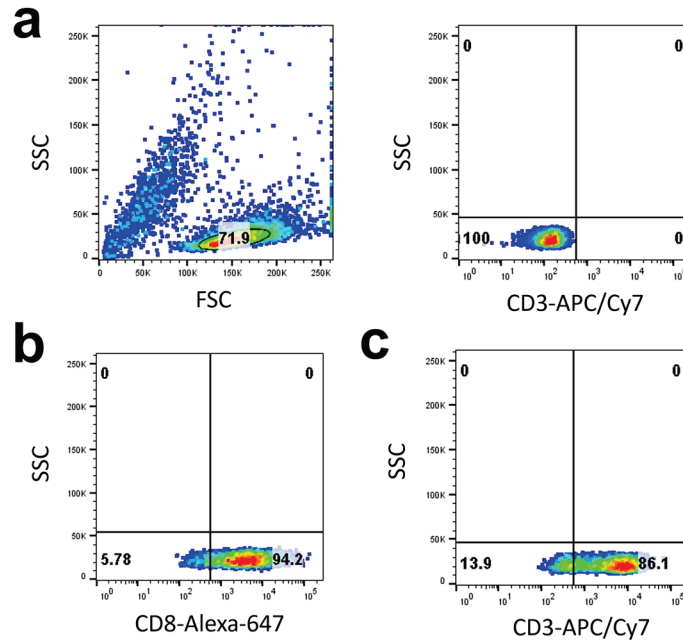

**Supplementary Figure 7.** Flow cytometry gating.

**a)** Analysis of untransduced Jurkat 76 cells. Left panel shows side scatter (SSC) vs. forward scatter (FSC) gating strategy for identifying viable single cells as defined by the “singlets” gate, with percent of that subpopulation shown. Right panel shows singlet-gated subpopulations analyzed for CD3 expression by anti-human CD3-APC/Cy7 antibody confirming lack of TCR.

**b, c)** Analysis of TII1383I expressing CD8+ Jurkat 76 cells. Panel **b** shows side scatter (SSC) vs. CD8-Alexa 647 staining to demonstrate levels of CD8 expression. Panel **c** shows cells transduced with full-length TII1383I TCR, tested for CD3 expression by anti-human CD3-APC/Cy7 antibody, confirming the presence of TCR.

**Supplementary Table 1.** X-ray data and refinement statistics.

---

|                                          |                            |
|------------------------------------------|----------------------------|
| Data collection                          |                            |
| Resolution (Å)*                          | 36.31 - 2.54 (2.63 - 2.54) |
| Space group                              | C 1 2 1                    |
| Unit cell dimensions (Å)                 | 114.74, 74.44, 131.06      |
| Unit cell angles (°)                     | 90, 93.49, 90              |
| Unique reflections*                      | 36,440 (3,527)             |
| Multiplicity*                            | 1.0 (1.0)                  |
| Completeness (%)*                        | 99.52 (96.87)              |
| Mean I/σ*                                | 8.27 (2.07)                |
| R <sub>meas</sub> *                      | 0.16 (1.05)                |
| R <sub>pim</sub> *                       | 0.06 (0.43)                |
| CC <sub>1/2</sub> *                      | 0.99 (0.69)                |
| Refinement                               |                            |
| R <sub>work</sub>                        | 0.21                       |
| R <sub>free</sub>                        | 0.25                       |
| Reflections used in refinement*          | 36,430 (3,525)             |
| Reflections used for R <sub>free</sub> * | 2,006 (201)                |
| Wilson B-factor (Å <sup>2</sup> )        | 56.46                      |
| Number of non-hydrogen atoms             | 6,295                      |
| macromolecules                           | 6,213                      |
| ligands                                  | 0                          |
| solvent                                  | 82                         |
| Protein residues                         | 773                        |
| Bond lengths RMSD (Å)                    | 0.005                      |
| Average B-factor (Å <sup>2</sup> )       | 89.5                       |
| TCR                                      | 68.5                       |
| peptide                                  | 72.4                       |
| MHC                                      | 117.6                      |
| Bond angles RMSD (°)                     | 0.92                       |
| Ramachandran favored (%)                 | 97.51                      |
| Ramachandran allowed (%)                 | 2.49                       |
| Ramachandran outliers (%)                | 0                          |
| Rotamer outliers (%)                     | 1.32                       |
| Clashscore                               | 8.85                       |
| PDB ID Code                              | 7RK7                       |

---

\* Statistics for the highest-resolution shell are shown in parentheses.

**Supplementary Table 2.** Oligonucleotides used for site directed mutagenesis.

| <b>Primer Name</b>           | <b>Sequence</b>                        | <b>Description</b>                       |
|------------------------------|----------------------------------------|------------------------------------------|
| TIL1383I-N100 $\alpha$ A-FP  | GGTGGCCCTGGCCTATGGCGGTAGC              | Asn 100 to Ala in $\alpha$ chain forward |
| TIL1383I-N100 $\alpha$ A-RP  | AGGCAGTAATAAACTGCGGTATCGCTCAGGCTCACG   | Asn 100 to Ala in $\alpha$ chain reverse |
| TIL1383I-Y101 $\alpha$ A-FP  | GGCCCTGAACGCCGGCGGTAGCCAG              | Tyr 101 to Ala in $\alpha$ chain forward |
| TIL1383I-Y101 $\alpha$ A-RP  | ACCAGGCAGTAATAAACTGCGGTATCGCTCAGGCT    | Tyr 101 to Ala in $\alpha$ chain reverse |
| TIL1383I-E101 $\beta$ A-FP   | CAGCCCGACCGCCGAAGGCGGCCT               | Glu 101 to Ala in $\beta$ chain forward  |
| TIL1383I-E101 $\beta$ A-RP   | ATGGCGCAGAAATAAACGCTTGTCTGGCTGCTGGTGGC | Glu 101 to Ala in $\beta$ chain reverse  |
| TIL1383I-I106 $\beta$ A-FP   | AGGCGGCCTGGCCTTCCCGGGCAA               | Ile 106 to Ala in $\beta$ chain forward  |
| TIL1383I-I106 $\beta$ A-RP   | TCTTCGGTCGGGCTGATGGCGCAGAA             | Ile 106 to Ala in $\beta$ chain reverse  |
| TIL1383I-CDR3 $\beta$ Del-FP | CTGATTTTCCCGGGCAACACCATCTAC            | Deletion in CDR3 $\beta$ loop forward    |
| TIL1383I-CDR3 $\beta$ Del-RP | TTCGGTCGGGCTGATGGCGCAG                 | Deletion in CDR3 $\beta$ loop reverse    |
| HLA-A2 R65A-FP               | GAGACCGCCAAAGTTAAAGCCCATAGCCAGACC      | Arg 65 to Ala in HLA-A2 forward          |
| HLA-A2 R65A-RP               | GCCATCCAGTATTCTGGGC                    | Arg 65 to Ala in HLA-A2 reverse          |
